# Supplementary material for: Dormancy Signatures and Metastasis in Estrogen Receptor Positive and Negative Breast Cancer
Source: PLoS One. 2012 Apr 18;7(4):e35569. doi: 10.1371/journal.pone.0035569 (PMC3329481; doi:10.1371/journal.pone.0035569)
Supplement: Data S5 — Data set referred to in Text S1 as dt.Wang.signature.xls. (XLS) [file pone.0035569.s006.xls]

probe.set	dormancy	gene	GSM36777	GSM36778	GSM36779	GSM36780	GSM36781	GSM36782	GSM36783	GSM36784	GSM36785	GSM36786	GSM36787	GSM36788	GSM36789	GSM36790	GSM36791	GSM36792	GSM36793	GSM36794	GSM36795	GSM36796	GSM36797	GSM36798	GSM36799	GSM36800	GSM36801	GSM36802	GSM36803	GSM36804	GSM36805	GSM36806	GSM36807	GSM36808	GSM36809	GSM36810	GSM36811	GSM36812	GSM36813	GSM36814	GSM36815	GSM36816	GSM36817	GSM36818	GSM36819	GSM36820	GSM36821	GSM36822	GSM36823
203935_at	1	ACVR1	490.4	339.77	391.43	577.94	307.84	530.34	321.58	427.65	518.33	768.79	341.02	336.3	459.96	909.67	429.64	401.66	346.89	638.16	238.82	417.73	367.24	557.77	374.22	329.41	433.2	434.76	384.22	493.46	440.5	496.87	568.85	708.2	654.55	341.25	441.1	514.41	437.25	656.95	345.12	625.51	301.18	784.82	474.86	366.57	394.83	240.37	408.67
209521_s_at	1	AMOT	84.24	128.36	101.59	107.2	107.29	89.74	72.66	92.65	91.16	111.42	129.66	87.62	90.67	82.19	99.43	95.49	93.27	118.61	113.33	112.44	105.98	115.27	122.45	96.45	97.89	107.41	110.47	84.24	92.49	106.43	87.08	96.05	105.74	85.76	122.5	95.58	118.36	113.57	105.17	103.27	75.18	90.81	106.11	97.33	113.98	73.82	108.52
210027_s_at	-1	APEX1	1504.61	981.18	1272.42	1559.19	1390.78	1933.87	2371.06	1649.31	1801.1	2018.68	1108.29	1307.87	1599.34	2130.93	1791.17	1440.53	1707.46	1101.93	1438.56	2098.58	2280.74	1602.61	2016.45	1433.39	1695.3	1787.81	1370.2	1585.68	2492.52	1488.04	1892.59	1701.25	1345.6	1780.76	1077.49	1976.52	1339.26	1685.94	1455.25	1839.58	1914.84	1245.87	1974.92	2098.89	2366.99	2244.38	1373.16
205047_s_at	-1	ASNS	206.97	237.19	200.33	165.98	189.77	194.83	264.13	203.54	151.23	252.25	85.95	823.95	172.08	368.62	196.06	303.07	253.39	227.08	291.94	294.05	475.65	341.08	322.96	159.37	164.87	229.94	173.63	187.66	323.61	129.27	197.23	130.16	158.23	139.3	181.18	239.75	159.28	302.75	176.83	295.95	232.89	119.94	306.22	338.15	178.97	312.81	354.18
202672_s_at	-1	ATF3	229.25	317.85	251.58	255.94	201.09	412.48	236.81	203.94	254.15	314.98	387.06	393.2	303.22	162.94	377.4	257.4	472.43	247.25	842.9	271.94	510.3	674.96	255.1	139.48	398.93	204.01	138.59	171.81	218.62	933.81	2674	969.07	542.27	185.95	308.74	2006.25	520.63	1006.89	175.61	1196.82	210.95	771.28	364.58	207.85	154.16	306.77	384.22
200779_at	-1	ATF4	2552.44	2614.59	3975.32	2831.49	3448.31	3194.61	3596.19	3471.18	2446.56	3080.03	2516.19	3561.03	4083.63	3014.32	3091.7	2222.18	3965.59	4194.59	2532.77	4370.97	3795.74	4030.96	3507.86	2576.42	2853.43	2742.68	2758.54	2947.01	3837.14	2537.78	3276.24	2946.3	4807.05	2902.41	3120.55	3018.2	2888.07	3305.63	3055.79	3439.91	5662.19	3216.04	3402.34	3833.53	1993.36	3898.21	3418.6
221530_s_at	1	BHLHE41	990.4	599.17	390.36	428.74	512.5	1369.05	794.39	1176.61	756.41	1603.54	764.44	596.98	418.07	1154.23	1013.16	537.44	1362.65	605.88	176.3	1754.14	1123.23	965.61	485.55	310.93	2060.65	977.45	844.88	1200.48	556.27	925.32	2016.94	641.32	584.99	355.7	787.19	1219.77	1846.56	1053.91	674.52	1052.67	462.03	798.22	872.24	961.12	378.87	213.35	579.13
203755_at	-1	BUB1B	203.26	338.4	214.75	280.38	434.19	273.16	256.89	321.95	301.22	257.2	356.78	543.22	324.26	185.52	296.59	474.46	271.64	339.18	421.98	266.63	698.68	434.94	405.59	317.79	331.18	232.39	332.54	234.76	257.1	180.76	246.18	324.49	338.66	408.28	262.37	248.66	433.05	424.22	279.07	378.02	286.3	263.23	312.76	391.12	404.29	433.79	513.81
209714_s_at	-1	CDKN3	152.2	351.61	102.86	226.28	729.76	200.95	138.51	641.93	230.77	247.84	225.78	1002.03	244.06	132.08	175.54	216.29	123.77	156.88	182.4	227.14	722.3	449.29	254.84	343.85	311.32	132.4	150.46	157.95	352.37	125.23	113.33	172.68	516.32	210.89	209.87	141.1	307.32	238.19	218.23	332.95	151.19	157.87	211.26	395.94	281.15	138.36	306.51
204203_at	-1	CEBPG	157.81	132.04	158.14	157.68	171.47	138.66	106.08	121.12	121.55	111.88	108.77	260.9	140.49	185.98	101.62	92.42	120.01	192.21	215.54	186.54	352.13	190.56	173.05	129.17	141.54	93.61	118.9	131.41	165.49	136.58	103.62	218.55	318.61	116.95	139.15	126.94	134.22	194.38	125.76	178.4	184.8	108.23	147.54	176.45	162.87	247.17	247.52
204170_s_at	-1	CKS2	978.23	1015.78	499.07	713.89	1166.31	551.09	617.83	889.72	1129.23	819.31	1051.07	2955.51	1299.68	505.67	641.39	1632.97	290.24	537.65	537.8	1048.52	1478.69	1137.83	748.93	639.77	1156.64	774.52	521.54	633.3	319.03	842.04	575.34	512.54	918.75	1219.62	331.92	1008.28	1970.16	780.74	1093.95	770.05	780.4	960.33	903.74	1299.07	1625.63	1065.68	1280.65
213110_s_at	1	COL4A5	560.21	519.47	110.95	192.5	511.83	344.75	462.82	473.86	548.96	519.24	330.26	123.62	2535.53	1133.83	589.31	1841.11	802.95	73.94	195.64	291.64	205.19	109.58	867.99	327.59	473.15	1093.92	670.5	925.28	713.63	293.66	580.47	427.04	271.18	287.97	510.35	1240.98	359.1	749.32	743.68	223.19	104.59	490.94	1395.11	337.73	201.16	85.94	501.34
200766_at	1	CTSD	717.03	296.67	822.98	999.06	523.71	562.29	305.93	309.01	620.17	965.62	241.9	358.29	1052.95	752.5	352.78	184.31	220.36	281.18	503.21	630.1	360.7	285.61	564.09	1318.66	526.76	330.61	358.97	1851.29	3184.63	960.91	521.25	349.39	485.17	2050.99	3064.8	564.26	202.73	665.02	401.66	458.81	451.42	890.74	932.66	300.94	1025.38	607.74	304.52
201697_s_at	-1	DNMT1	850.83	720.45	360.69	534.28	757.69	728.94	625.41	656.39	537.78	1048.23	624.01	1491.25	567.07	784.34	656.8	928.75	531.96	393.78	487.99	1210.96	1869.4	1207.79	729.58	768.74	1126.51	829.15	944.02	1239.57	1065.01	1189.62	901.21	1068.48	780.25	1067.84	698.39	694.29	1237.56	1132.04	961.78	1520.64	923.53	907.73	869.37	1064.92	492.26	454.86	2445.37
203270_at	-1	DTYMK	251.67	446.68	205.84	252.64	319.55	220.05	240.89	240.82	245.32	271.37	215.87	652.17	227.07	220.49	197.7	326.88	210.58	203.91	210.41	279.1	362	313.07	377.12	260.04	275.57	261.48	351.48	277.4	207.88	256.57	248.79	268.67	265.06	307.71	332.65	213.16	262.49	346.86	307.45	294.6	268.77	216.82	276.53	442.14	249.04	398.74	478.4
208394_x_at	-1	ESM1	62.2	73.84	128.05	61.27	51.55	67.04	87.76	67.76	86.63	62.84	72.1	73.9	75.63	54.32	69.51	81.89	65.51	38.97	237.32	53.4	79.03	80.43	57.54	91.38	45.37	62.31	71.51	56.66	62.85	65.28	59.44	53.62	105.17	60.52	80.29	81.14	79.44	77.47	55.51	66.16	36.29	60.11	104.83	55.21	40.25	39.78	52.44
204420_at	-1	FOSL1	219.68	338.36	228.59	305.91	275.96	245.36	194.27	334.55	290.23	232	407.67	265.17	293.14	178.12	352.82	236.6	369.17	225.88	309.51	326.99	276	278.74	285.88	212.65	330.48	262.28	299.36	239.39	223.61	218.55	275.16	351.28	401.02	272.86	238.93	256.77	465.54	276.73	207.66	295.58	210.24	234.53	218.36	244.85	311.29	244.5	242.95
202580_x_at	-1	FOXM1	173.32	482	163.97	385.59	492.24	200.69	164.36	326.96	248.83	227.44	334.27	642.82	291.66	144.08	219.23	370.76	329.22	193.01	324.01	308.57	786.56	424.59	362.78	249.86	235.05	202.26	303.01	210.29	254.92	160.76	206.02	283.55	336	238.53	248.35	193.81	311.7	294.07	261.39	339.82	293.1	219.4	230.46	748.48	343.43	271.82	561.47
210002_at	1	GATA6	45.02	63.96	33.01	34.47	124.08	57.67	58.61	42.75	41.5	91.64	100.64	56.2	56.41	102.59	44.09	46.93	365.88	58.6	115.43	65.45	120.35	127.34	53.68	57.01	66.49	101.26	58.64	55.17	84.3	75.13	94.95	93.42	61.65	46.98	87.58	66.43	117.69	80.26	101.28	77	54.89	66.27	53.17	66.82	58.66	45.23	98.23
209806_at	1	HIST1H2BK	712.54	2396.01	2557.64	3456.84	1680.62	870.72	1399.36	1727.23	1388.87	659.29	1998.22	2987.69	3138.32	2977.5	2050.39	1333.67	2280.64	1098.63	1630.73	1744.25	1965.4	1840.37	425.33	1177.97	2321.52	4083.13	2250.95	864.66	3806.71	890.74	2022.83	5176.09	1043.48	624.57	611.2	2042.75	1069.08	1588.15	1610.62	1693.77	1293.56	1162.9	2540.45	1288.56	1141.47	2446.69	3722.35
204475_at	-1	MMP1	207.56	203.32	79.5	795.77	384.04	97.17	72.38	291.45	1801.33	67.84	321.83	551.39	1967.15	80.28	95.44	91.27	76.08	2879.49	85.56	76.81	228.16	2179.49	272.85	128.24	75.57	167.42	151.05	133.99	107.51	83.25	80.53	1318.46	3279.37	104.27	318.18	86.1	88.13	161.46	48.99	179.22	70.16	135.26	146.75	218.49	109.37	350.22	76.46
201069_at	1	MMP2	1803.29	1386.13	329.06	1398.53	751.67	2858.77	568.28	1903.64	2228.06	1583.05	621.81	670.04	1396.56	2692.96	2633.94	578.85	2529.64	3555.43	345.19	1090.38	1898.57	2129.72	1548.51	803.97	833.77	2578.4	1188.93	1883.53	706.07	2844.12	1873.32	2686.06	4357.06	1664.37	2556.48	2988.52	1584.53	3384.92	942.89	1912.1	238.78	4115.17	1840.32	977.42	1093.41	686.15	1035.13
203939_at	-1	NT5E	130.35	247.99	93.43	157.25	128.01	154.91	82.68	141.15	150.92	132.09	139.44	118.13	134.37	129.49	129.26	94.65	90.08	194.17	128.12	125.19	135.8	133.84	111.7	122.55	114.2	127.4	121.78	131.92	123.22	157.56	122.82	146.59	234.37	132.73	230.27	183.42	126.54	140.18	161.59	194.78	96.49	168.53	129.43	133.26	129.86	106.74	93.37
200790_at	-1	ODC1	395.23	314.43	512.21	718.9	525.94	537.31	825.51	540.83	668.56	487.89	357.16	742.77	322.87	401.26	374.25	263.78	714.07	1108.61	950.65	430.21	1251.93	443.77	315.7	427.96	710.53	213.24	793.03	471.46	213.31	357.52	626.6	961.59	576.07	368.08	455.74	501.42	386.14	856.96	251.58	1044.4	1062.59	399.98	548.16	1191.92	443.11	626.15	313.05
207543_s_at	1	P4HA1	563.43	856.96	583.64	886.53	1266.37	787.21	590.37	551.15	556.52	546.1	692.59	1136.77	874.74	1071.77	574.27	361.36	361.22	599.05	1395.5	850.41	929.17	673.86	546.2	1219.56	516.97	876.67	905.63	618.95	1730.98	490.27	644.7	527.66	1235.77	613.12	1068.69	808.81	655.12	985.67	865.59	697.53	486.21	786.48	866.07	754.41	604.02	390.88	536.78
201860_s_at	-1	PLAT	1714.29	1329.64	801.21	371.73	157	992.02	981.36	1475.36	3753.32	574.27	266.65	191.95	1501.26	825.58	553.37	2331.04	481.27	370.38	104.22	325.87	286.95	512.9	459.51	625.21	210.92	604.71	1047.82	2835.36	179.83	444.84	773.07	909.94	626.78	273.6	1666.86	473.83	298.26	655.42	249.06	291.49	101.96	820.36	958.82	522.98	364.58	193.56	464.12
202308_at	1	SREBF1	1614.43	3006.7	5575.45	2151.58	1736.59	1424.38	2625.8	2227.12	2539.17	2835.25	2419.67	3926	3496.96	1584.62	2681.54	3463.93	639.82	746.1	4222	5404.69	2943.77	849.67	1194.03	4388.63	1222.23	4365.01	3419.32	2541.54	2282.46	3313.55	1621.68	1911.19	573.5	1960.48	1940.59	2307.99	1271.57	2251.82	3843.47	1062.39	942.18	1317.74	2106.99	2148.51	1405.16	757.04	1809.78
202338_at	-1	TK1	196.11	489.09	337.65	765.64	592.78	308.4	319.68	468.74	324.59	314.81	546.59	1264.45	413.84	234.95	303.41	297.66	257.7	276.82	377.39	448.89	1126.86	674.69	300.52	584.84	454.58	207.33	632.71	171.32	570.29	232.67	268.37	2133.46	669.4	392.34	302.6	193.98	345.47	1775.19	323.61	339.41	331.4	271.98	249.62	829.42	387.88	528.65	685.1
216837_at	1	EPHA5	113.4	196.65	134.63	168	154.03	141.59	148.76	212.1	150.7	112.48	132.98	139.55	151.04	123.53	209.27	143.95	130.51	198.25	169.21	147.7	122.89	120.46	194.21	143.74	122.43	124.82	188.71	114.09	143.73	104.43	137.91	177.06	150.91	139.32	187.26	161.27	163.02	163.01	143.63	121.78	151.44	134.28	142.32	147.37	154.75	141.08	116.85
213972_at	-1	FOXD1	113.69	140.67	125.91	143.26	122.03	127.17	119.45	132.48	122.43	102.51	131.03	130.2	137.14	106.56	151.24	134.44	109.59	146.07	150.87	143.53	112.16	137.66	113.42	129.46	118.42	110.19	120.14	101.99	142.38	117.68	116.92	140.4	144.35	140.28	120.69	121	142.68	129.81	124.07	123.83	121.34	130.97	151.86	115.13	139.93	138.67	138.45
209505_at	1	NR2F1	188.47	124.2	62.26	311.34	66.75	331.1	85.28	218.67	70.02	994.37	91.16	95.41	60.13	552.72	167.91	87.92	335.64	73.9	50.52	501.4	132.09	196.22	2685.1	104.26	164.06	284.88	353.27	205.6	95.82	413.65	682.8	154.29	180.23	52.02	368.62	294.66	967.66	2023.77	170.2	368.36	1276.96	121.94	251.25	106.57	107.36	43.82	176.05
212688_at	-1	PIK3CB	253.8	408.96	557.18	182.09	232.21	277.72	317.83	167.67	262.94	304.12	548.69	293.4	334.54	419.28	261.09	531.31	233.3	280.96	667.67	237.94	363.99	472.24	287.36	341.5	358.75	314.95	471.8	281.39	308.94	350.79	238.07	380.84	251.75	204.47	253.83	286.9	216.06	508.16	418.99	347.19	274.84	287.13	302.06	378.19	310.91	245.14	447.6
208991_at	1	STAT3	1750.74	480.45	2053.92	1788.41	1507.51	1938.41	2123.36	1564.65	2070.06	1579.62	952.45	1735.49	1129.99	1743.89	2036.77	997.14	1274.68	1098.73	1754.08	1045.05	1119.27	1132.11	996.87	3132.23	1008.78	1371.97	721.91	1518.43	2734.62	1699.14	1680.96	1575.79	1010.9	2671.77	528.98	1149.36	764.47	664.69	742.04	1152.35	2472.12	2315.45	1166.19	872.76	1356.59	2315.43	729.81
220406_at	1	TGFB2	102.5	121.86	124.57	134.04	182.81	126.98	158.25	180.87	115.01	94.85	137.97	127.15	143.06	105.65	147.74	130.17	96.25	227.61	188.88	108.08	108.9	96.42	143.38	133.41	102.1	98.68	123.68	109.64	141.07	82.75	118.3	140.01	131.65	170.66	154.62	154.62	160.1	136.49	140.69	108.67	170.31	125.57	142.18	127.51	147.06	166.39	135.9
215775_at	1	THBS1	182.28	224.54	168.76	204.91	179.9	150.07	157.96	246.47	191.68	147.67	222.93	144.45	184.56	168.19	181.43	184.37	148.35	152.12	208.72	215.17	204.31	178.38	187.73	180.74	172.34	156.27	185.59	163.7	190.82	169.33	143.74	139.29	204.38	247.08	178.19	220.2	183.63	167.44	212.88	167.18	165.22	168.01	232.49	171.52	168.19	141.4	190.63
201746_at	1	TP53	796.41	545.79	292.9	514.21	1233.75	536.96	407.39	564.85	572.75	735.96	549.55	152.54	1076.54	1020.96	421.79	946.95	574.77	324.99	107.09	363.09	952.08	255.54	553.8	375.65	476.18	457	713.55	583.77	352.16	480.6	705.79	659.55	830.42	447.94	587.48	564.35	837.9	310.6	414.86	715.09	891.33	536.1	603.72	544.51	664.45	307.61	1097.29
206117_at	1	TPM1	156.79	280.58	143.73	191.55	121.45	196.02	150.01	184.48	233.28	155.38	208.32	206.97	183.11	213.59	209.81	122.02	247.41	120.22	137.45	175.81	141.7	181.88	227.78	123.77	154.54	216.97	219.56	623.81	146.84	202.84	247.35	155.17	240.24	131.72	204.12	258.8	206.19	285.23	175.22	157.78	129.01	163.68	226.07	157.79	158.79	199.33	137.26
209642_at	-1	BUB1	98.41	153.28	88.65	113.27	122.5	102.29	103.13	120.1	125.6	115.78	121.17	166.77	114.49	81.24	126.79	157.43	71.35	115.72	102.99	102.78	322.71	163.07	140.55	126.78	122.14	79.37	98.23	93.18	107.4	73.19	84.98	165.43	149.88	113.78	93.49	92.26	116.86	135.04	105.32	160.05	141.01	97.5	119.64	147.74	133.9	154.2	159.63
211550_at	-1	EGFR	254.81	314.09	234.84	284.12	295.35	259.56	210.2	306.12	289.89	245.78	348.17	293.74	319.22	197.28	287.51	268.01	353.3	313.64	326.06	323.57	298.7	314.39	319.57	235.46	339.11	257.33	288.29	241.7	277.84	211.75	234.09	330.36	299.79	230.16	286.67	262.34	324.67	304.95	232.61	284.86	257.18	242.73	250.17	289.33	347.15	281.69	205.38
203628_at	-1	IGF1R	200.77	821.41	425.58	107.04	70.32	130.4	141.11	206.86	343.63	451.95	599.59	73.73	393.99	481.95	228.79	516.94	183.09	79.37	74.8	503.37	97.28	152.68	1257.27	387.47	247.56	765.35	827.32	6612.3	506.19	478.25	269.35	73.14	158.14	444.36	329.33	584.63	207.03	246.2	428.2	148.59	77.15	272	344.42	588.32	143.23	217.73	396.84
211959_at	1	IGFBP5	2963.36	113.06	101.98	332.52	166.69	525.68	166.16	322.53	289.03	290.48	123.91	122.26	341.2	1493.53	180.06	122.97	159.78	460.83	716.38	806.72	202.17	294.48	115	1213.01	560.86	1187.38	754.53	1593.55	157.59	2841.16	381.31	232.68	1118.8	666	232.11	299.65	166.67	126.73	164.5	463.11	306.15	622.88	329.62	163.85	2597.62	148.94	241.82
214895_s_at	1	ADAM10	106.53	106.69	116.03	132.89	73.73	154.92	167	106.38	203.69	87.46	118.54	65.65	60.82	96.24	118.4	79.41	117.06	98.14	125.08	100.08	68.87	73.88	92.5	132.81	105.38	165.43	82.87	90.16	133.97	99.46	119.62	105.08	89.58	68.68	63.19	69.42	85.62	71.14	67.08	70.78	64.62	165.29	85.43	79.67	107.75	91.53	56.41
1007_s_at	1	DDR1	2569.35	3038.45	3200.16	2367.99	2329.06	2119.64	2991.2	2651.63	2344.42	2814.16	3250.24	2153.78	2704.1	1965.67	2647.61	2577.18	2785.55	1078.03	2336.67	2210.7	2306.84	2110.82	2111.22	3190.15	2796.77	2656.9	2541.2	2204.06	3566.16	2630.94	2346.95	2726.86	1664.29	1862.28	1331.46	1727.28	1698.91	1865.68	1881.12	1420.57	1728.24	1639.15	2383.3	2093.83	1921.93	1854.05	1915.86
211506_s_at	-1	IL8	81.03	143.95	72.25	232.66	124.23	82.83	75.39	103.9	97.62	366.96	97.06	97.1	87.37	75.29	125.5	78.78	70.85	115.46	127.11	97.7	87.57	83.06	102.58	96.5	82.56	82.7	106.93	105.49	102.95	101.21	95.07	203.47	105.59	132.03	101.77	112.66	111.91	123.52	98.64	86.64	83.06	88.16	109.4	92.74	114.36	72.19	80.84
202311_s_at	1	COL1A1	833.48	254.15	77.99	343.79	125.83	1105.81	194.03	378.55	867.69	146.99	167.99	153.53	705.3	506.43	988.32	234.97	225.71	364.73	101.34	192.13	356.44	341.54	312.57	151.72	107.23	527.01	237.91	986.89	229.1	1183.77	779.6	465.91	1260.6	654.73	259.63	999.94	146.67	785.86	215.08	440.87	84.86	1692.86	403.35	328.5	383.12	268.97	235.69
201693_s_at	-1	EGR1	1459.56	481.6	538.45	1009.89	422.83	2461.93	654.73	1291.36	1303.81	2556.07	373.5	642.45	1698.47	920.33	887.1	2610.3	2723.86	1024.54	1138.31	1499.08	2248.31	786.27	789.59	499.75	749.17	943.36	852.74	1446.38	642.02	2214.82	2452.16	2556.37	1464.31	1205.82	680.39	3535.92	1244.5	2410.93	382.15	3015.65	981.42	1261.74	481.91	404.97	807.32	443.79	645.15
201466_s_at	-1	JUN	692.3	574.25	347.62	688.6	197.51	1045.1	536.18	497.16	721.98	1451.58	381.55	532.56	950.48	507.94	259.87	1601.11	1223.54	347.83	739.78	370.02	1690.2	987.43	646.7	966.9	388.04	594.29	657.68	882.25	460.67	1343.39	1851.98	420.56	783.24	578.9	856.28	2243.55	654.61	1617.3	264.09	1441.8	149.73	576.53	445.76	362.28	371.4	381.13	380.76
202935_s_at	1	SOX9	388.78	90.05	563.01	272.71	437.68	211.15	359.47	170.79	480.05	293.01	190.72	464.02	491.45	306.09	191.19	153.63	448.26	106.51	588.6	272.75	125.32	176.28	115.21	244.76	164.9	665.05	338.36	276.05	296.69	562.23	359.6	132.12	192.3	251.01	246.67	140.72	168.41	171.14	257.08	170.82	304.71	109.04	190.02	246.15	228.54	111.66	367.41
201149_s_at	-1	TIMP3	834.08	410.09	3278.77	568.15	234.19	883.55	284.7	477.18	2035.58	511.15	396.97	206.82	700.65	662.63	758.66	346.44	321.95	923.03	270.73	604.54	396.72	513.29	380.17	711.86	344.54	1696.87	471.17	1635.64	1195.58	1153.44	452.23	507.75	1348.06	1021.64	1302.65	690.04	240.09	470.52	316.32	471.69	257.67	1866.26	347.4	463.41	845.32	350.86	495.01
[truncated: 239 more columns]
